1  
2  
3  
4  
5  
6  
7  
8  
9  
10  
11  
12  
13  
14  
15  
16  
17  
18  
19  
20  
21  
22  
23  
24  
25  
26  
27  
28  
29  
30  
31  
32  
33  
34  
35  
36  
37  
38  
39  
40

## **Systemic administration of Ivabradine, an HCN channel inhibitor, blocks spontaneous absence seizures**

Yasmine Iacone<sup>1,2\*#</sup>, Tatiana P. Morais<sup>3\*</sup>, François David<sup>4</sup>, Francis Delicata<sup>5</sup>, Joanna Sandle<sup>6</sup>,  
Timea Raffai<sup>7,8</sup>, H. Rheinallt Parri<sup>5</sup>, Johan Juhl Weisser<sup>1</sup>, Christoffer Bundgaard<sup>1</sup>, Ib  
Vestergaard Klewe<sup>1</sup>, Gábor Tamás<sup>6</sup>, Morten Skøtt Thomsen<sup>1</sup>, Vincenzo Crunelli<sup>3,9\*#</sup> and  
Magor L. Lőrincz<sup>3,7,8#</sup>

<sup>1</sup>Neuroscience Research, H. Lundbeck A/S, Valby, Denmark; <sup>2</sup>Biomedical Sciences, Faculty  
of Health and Medical Sciences, Copenhagen University, Copenhagen, Denmark;  
<sup>3</sup>Neuroscience Division, School of Biosciences, Cardiff University, Cardiff, UK; <sup>4</sup>Integrative  
Neuroscience and Cognition Center, Université de Paris, Paris, France; <sup>5</sup>School of Life and  
Health Sciences, Aston University, Birmingham, UK; <sup>6</sup>MTA-SZTE Research Group for  
Cortical Microcircuits, Department of Anatomy, Physiology and Neuroscience, University of  
Szeged, Szeged, Hungary; <sup>7</sup>Department of Physiology, Anatomy and Neuroscience, Faculty  
of Sciences, University of Szeged, Szeged, Hungary; <sup>8</sup>Department of Physiology, Faculty of  
Medicine, University of Szeged, Szeged, Hungary; <sup>9</sup>Department of Physiology and  
Biochemistry, Faculty of Medicine and Surgery, University of Malta, Msida, Malta

Abbreviated title: Ivabradine blocks absence seizures

\*These authors contributed equally to the work

#Correspondence:

Yasmine Iacone: [yaia@lundbeck.com](mailto:yaia@lundbeck.com)

Vincenzo Crunelli: [crunelli@cardiff.ac.uk](mailto:crunelli@cardiff.ac.uk)

Magor L. Lőrincz: [mlorincz@gmail.com](mailto:mlorincz@gmail.com)

Number of figures: 5

Number of tables: 0

Summary: 301 words

Introduction: 601 words

Discussion: 1001 words

References: 50

41 **Conflict of Interest**

42 Y.I., J.J.W, C.B., M.S.T. and I.V.K. are Lundbeck A/S employees. The other authors declare  
43 no conflict of interest.

44

45 **Acknowledgements**

46 We wish to thank Dr Nihan Çarçak (Istanbul University) for the help with intracerebral  
47 injections. Y. Iacone, T. P. Morais and F. Delicata were supported by a Marie Curie ITN PhD  
48 studentship (grant H2020-MSCA-ITN-2016-722053). J. Sandle was supported by the Szeged  
49 Scientists Academy under the sponsorship of the Hungarian Ministry of  
50 Innovation and Technology (grant FEIF/433-4/2020-ITM\_SZERZ). This work was supported  
51 by the Ester Florida Neuroscience Foundation, the Wellcome Trust (Programme Grant  
52 91882 to V.C.), the Eötvös Loránd Research Network (G.T.), the National Research,  
53 Development and Innovation Office of Hungary (GINOP-2.3.2-15-2016-00018, Élvonal  
54 KKP-20 KKP 133807 to G.T.), the Ministry of Human Capacities, Hungary (20391-  
55 3/2018/FEKUSTRAT to G.T.), the Hungarian Scientific Research Fund (Grants NN125601  
56 and FK123831 to M.L.L.) and the Hungarian Brain Research Program (Grant  
57 KTIA\_NAP\_13-2-2014-0014 to M.L.L.).

58

59

60 **Authors' contribution**

61 Y.I., T.P.M., M.S.T., I.V.K., G.T., V.C. and M.L.L. designed research; Y.I., T.P.M., F. David,  
62 F. Delicata, J.S., TR, H.R.P, J.J.W, C.B. and M.L.L. performed research and/or analysed  
63 data; Y.I. wrote the manuscript; M.S.T., V.C. and M.L.L. contributed to critical manuscript  
64 revisions; the rest of the authors contributed to final manuscript revisions.

65

66

67 **Summary**

68

69 **Objective:** Hyperpolarization-activated cyclic nucleotide-gated (HCN) channels are known  
70 to be involved in the generation of absence seizures (ASs), and there is evidence that cortical  
71 and thalamic HCN channel dysfunctions may have a pro-absence role. Many HCN channel  
72 blockers are available, but their role in ASs has been investigated only by localized brain  
73 injection or in *in vitro* model systems due to their limited brain availability. Here, we  
74 investigated the effect on ASs of orally administered ivabradine (an HCN channel blocker  
75 approved for the treatment of heart failure in humans) following injection of the P-  
76 glycoprotein inhibitor elacridar, that is known to increase penetration into the brain of drug  
77 substrates for this efflux transporter. The action of ivabradine was also tested following *in*  
78 *vivo* microinjection in the cortical initiation network (CIN) of the somatosensory cortex and  
79 in the thalamic ventrobasal nucleus (VB) as well as on cortical and thalamocortical neurons  
80 in brain slices.

81 **Methods:** We used EEG recordings in freely moving Genetic Absence Epilepsy from  
82 Strasbourg Rats (GAERS) to assess the action of oral administration of ivabradine, with and  
83 without elacridar, on ASs. Ivabradine was also microinjected in the CIN and VB of GAERS  
84 *in vivo* and applied to Wistar CIN and GAERS VB slices while recording patch-clamped  
85 cortical layer 5/6 and thalamocortical neurons, respectively.

86 **Results:** Oral administration of ivabradine markedly and dose-dependently reduced ASs.  
87 Ivabradine injection in CIN abolished ASs and elicited small-amplitude 4-7 Hz waves  
88 (without spikes), whereas in the VB it was less potent. Moreover, ivabradine applied to  
89 GAERS VB and Wistar CIN slices selectively decreased HCN-channel-dependent properties  
90 of cortical layer 5/6 pyramidal and thalamocortical neurons, respectively.

91 **Significance:** These results provide the first demonstration of the anti-absence action of a  
92 systemically administered HCN channel blocker, indicating the potential of this class of  
93 drugs as a novel therapeutic avenue for ASs.

94

95 **Keywords:** cortex, thalamus, thalamocortical neurons, Ih current, childhood absence epilepsy

96

97

98 **Introduction**

99 Absence seizures (ASs) are characterized by loss of consciousness and lack of voluntary  
100 movements accompanied by generalized spike-and-wave discharges (SWDs) in the  
101 electroencephalogram (EEG). ASs are present in several epilepsies and are the only clinical  
102 symptom of Childhood Absence Epilepsy (CAE),<sup>1,2</sup> which accounts for 10-17% of all  
103 children with epilepsy<sup>3</sup> and carries a burdensome personal, familial and societal impact.<sup>4,5</sup>  
104 The first-line therapy for CAE is ethosuximide monotherapy, followed by valproic acid or  
105 lamotrigine,<sup>6</sup> but about 30% of CAE children are pharmaco-resistant, resulting in polytherapy  
106 and a consequent marked increase in adverse effects.<sup>7-9</sup> Furthermore, about 60% of children  
107 with AS experience neuropsychiatric comorbidities (mainly attention/cognitive impairments),  
108 which can be present before the epilepsy diagnosis, and even be aggravated following full  
109 pharmacological control of ASs.<sup>10,11</sup> Hence, there is a pressing need to find new effective  
110 targets for AS treatment.

111 The role for hyperpolarization-activated cyclic nucleotide-gated (HCN) channels in ASs has  
112 been extensively investigated, with many studies reporting a gain- or loss-of-function, mainly  
113 involving HCN1 and HCN2 subtypes. In particular, analysis of recombinant HCN2 variants  
114 in humans with febrile seizures and genetic epilepsy with febrile seizures-plus shows an  
115 increased hyperpolarization-activated current ( $I_h$ ), the current generated by HCN channels.<sup>12</sup>  
116 Moreover, several HCN1 variants have been identified in children with early infantile  
117 epileptic encephalopathy that lead both to a gain- or loss-of-function,<sup>13</sup> while in sporadic  
118 idiopathic generalized epilepsy patients, point mutations of HCN2 give rise to a channel loss-  
119 of-function.<sup>14</sup> The diversity of these HCN channel dysregulations, however, together with the  
120 fact that ASs are not the only phenotype present in these patient cohorts, makes it difficult to  
121 draw any firm conclusion on the precise role of HCN channels in human ASs.

122 Studies in experimental animals have also demonstrated a critical role for HCN channels in  
123 ASs, but the results are often contradictory. Global knock-out of HCN1<sup>15</sup> or HCN2<sup>16</sup> elicits  
124 ASs, suggesting an anti-absence role of these channels. Furthermore, two genetic AS models  
125 showed both an increased thalamic and a decreased cortical  $I_h$  as well as a contrasting up- or  
126 down-regulation of HCN1 in both thalamus and cortex,<sup>17-20</sup> two brain regions that are  
127 essential for AS generation.<sup>21,22</sup> Moreover, removal of the cAMP-sensitivity of HCN2 in the  
128 whole brain or thalamic ventrobasal nucleus (VB)-selective HCN2 knock-down lead to  
129 ASs,<sup>23</sup> while VB-selective HCN4 knock-down has no effect.<sup>24</sup> Conversely, pharmacological  
130 and genetic suppression of HCN channels in the VB suppress ASs in three animal models,  
131 suggesting that HCN channels in this brain region have a pro-absence role.<sup>25</sup>

132 Notwithstanding the therapeutic potential of targeting HCN channel for the treatment of ASs,  
133 an HCN channel modulator must show efficacy following systemic administration for it to  
134 have clinical applicability. Several HCN channel blockers have been developed so far,<sup>26</sup>  
135 including ivabradine (IVA) (Procoralan<sup>®</sup>, Corlanor<sup>®</sup>), a drug approved for the treatment of  
136 heart failure.<sup>27-29</sup> All these HCN channel blockers, however, show a very limited ability to  
137 cross the blood-brain barrier (BBB), due to the efflux mediated by P-glycoproteins (Pgp).  
138 Thus, whereas HCN channel blockers have been extensively used to inhibit neuronal HCN  
139 channels *in vitro*,<sup>30</sup> the interpretation of the few brain investigations that used systemic  
140 administration are questionable due to their poor brain penetration.<sup>31-33</sup>

141 Here, we show for the first time that IVA orally administered together with Elacridar (ELA),  
142 a Pgp inhibitor,<sup>34</sup> elicits a marked and long-lasting reduction of ASs in a well-established AS  
143 model (the Genetic Absence Epilepsy Rats from Strasbourg, GAERS).<sup>35</sup> Additionally, a  
144 similar anti-absence action occurs when IVA is directly injected in the cortical initiation  
145 network (CIN)<sup>36</sup> and the VB, and IVA selectively decreases HCN channel-dependent  
146 properties of cortical layer 5/6 pyramidal and VB thalamocortical neurons *in vitro*.

147

## 148 [Materials and Methods](#)

### 149 [Animals](#)

150 GAERS (originally obtained from Strasbourg, France) were bred and maintained at Cardiff  
151 University (UK) and University of Szeged (Hungary). Wistar rats (originally from Envigo)  
152 were maintained at H. Lundbeck A/S (Valby, Denmark) and University of Szeged (Szeged,  
153 Hungary). Animals were provided with normal diet and water *ad libitum*, and kept under a  
154 light:dark cycle of 12:12 hours with light on at 7:00 AM. Experimental procedures were  
155 performed in agreement with the UK Animals (Scientific Procedures) Act (1986), the  
156 European Communities Council Directive (2010/63/EU) and the Danish legislation (Law and  
157 Order on Animal experiments; Act No. 474 of 15/05/2014 and Order No. 12 of 07/01/2016).

### 158 [IVA plasma and brain bioanalysis](#)

159 Plasma and brain concentrations of IVA were measured in 3 month-old male Wistar rats 1h  
160 after injection to assess its concentration at the time of the ELA peak brain concentration, and  
161 in 3-4 month old male GAERS 2h after the injection (i.e. at the end of the recording session)  
162 to measure brain IVA concentration at time of the last recording period (see below). Blood  
163 samples were kept in 1.6 mg EDTA/ml of blood, centrifuged at 3300 g for 15 min at 4°C and  
164 stored at -80°C until bioanalysis. Brains were stored at -80°C until bioanalysis.

165 Brain samples were prepared by homogenizing half brain using isothermal focused acoustic  
166 ultrasonication (Covaris E220x, Covaris, Inc., Woburn, MA) as described previously.<sup>37</sup> After  
167 homogenization calibration standards and QC samples were prepared in blank rat plasma and  
168 brain homogenate in a range of 0.5 ng/ml to 500 ng/ml. On the day of analysis, 25 µl of brain  
169 homogenates, plasma samples, calibration standards and QC samples were precipitated with  
170 100 µl acetonitrile containing internal standard. After centrifugation (20 min at 3500 g) 50 µl

171 supernatant was transferred to a 300  $\mu$ l 96-well plate and mixed with 150  $\mu$ l 25 % acetonitrile  
172 solution.

173 Ivabradine concentrations were determined using ultraperformance liquid chromatography  
174 (Acquity UPLC system; Waters, Milford, MA) coupled to a tandem mass spectrometry  
175 detector (Waters Xevo TQXS). Chromatographic separation was performed on a Waters  
176 C18SB HSS column (30 x 2.1 mm, 1.8  $\mu$ m particles) with a column compartment  
177 temperature of 40°C using gradient elution with mobile phases consisting of 0.1 % formic  
178 acid in water and 0.1 % formic acid in acetonitrile. Autosampler temperature was 10°C and  
179 injection volume was 5  $\mu$ l. Electrospray ionization was performed in positive mode. For  
180 Ivabradine the ion 469.3<sup>+</sup>  $\rightarrow$  262.1<sup>+</sup> was monitored.

181

## 182 [Surgical procedures](#)

183 Adult male GAERS (250-300 g) were anaesthetized with isoflurane (2-5%) and body  
184 temperature maintained at 37°C with a heating pad. Six gold-plated epidural screws (Svenska  
185 Dentorama AB, Sweden) were implanted in pairs, in frontal, parietal and cerebellar sites. For  
186 microinjection in the VB and CIN, one 8 mm long guide-cannula (C315G/50-99, Bilaney,  
187 UK) was also implanted in both hemispheres (VB: AP-3.2, ML $\pm$  3.6, DV4.5, with a 5°  
188 angle; CIN: AP-2.52, ML $\pm$  -4.8, DV1.3.<sup>38</sup> The animals were allowed to recover for at least  
189 five days prior to experiments.

190

## 191 [EEG recordings](#)

192 The day before experiments, rats were connected to the recording apparatus and placed  
193 individually in a plexiglass box within a Faraday cage for 1-2 hours habituation. On the day  
194 of the recordings, animals were placed into the plexiglass box for 30 minutes (habituation  
195 period) followed by 40 minutes recording (control period). They were then transferred to an



196 anaesthesia induction chamber, slightly anaesthetized with isoflurane (1%) and injected  
197 intravenously with either ELA (5mg/kg, 5ml/kg) or vehicle (VEH1) (hydroxypropyl- $\beta$ -  
198 cyclodextrin) as soon as the righting reflex was lost. Anaesthesia was then terminated, and 20  
199 min after the intravenous ELA (or VEH1) administration, the animals received either IVA  
200 (10, 20 and 30 mg/kg, all 10 ml/kg) or vehicle (VEH2) (5% D-glucose in distilled water)  
201 orally. Rats were then placed in the plexiglass box, reconnected to the EEG apparatus and  
202 recorded for 2 hours while being continuously monitored by one researcher. Drug-treatments  
203 (VEH1-VEH2, ELA-VEH2, VEH1-IVA and ELA-IVA) were assigned in a pseudo-random  
204 manner with a cross-over design. Each animal received a maximum of four different  
205 treatments with at least five days between each treatment.

206 For microinjection experiments, on the day of the experiment the animals were recorded for  
207 1h (control period), followed by the bilateral insertion of a 9 mm (C315I/20-49, Bilaney)  
208 cannula, that was connected to a micropump (CMA 400, Linton Instruments, UK). Animals  
209 were then injected with either artificial cerebrospinal fluid (aCSF) or IVA (6 nmoles) using a  
210 flow rate of 0.25  $\mu$ l/min for 2 min and recorded for 2 hours.

211 To check cannulae position, brains were collected and washed in PBS (10 mM) followed by  
212 fixation in 4% PFA for 24h. After fixation, 100  $\mu$ m coronal slices were cut from the region  
213 containing the CIN or VB and then mounted with VECTASHIELD® Antifade Mounting  
214 Media (Vector Laboratories, UK). Slices were imaged within the next 24 hours and  
215 photographed with an Olympus BX61 microscope (Olympus, Japan) with a 4X objective.  
216 Results from animals with misplaced cannulae position were not included in the final analysis.

217

## 218 Data acquisition and analysis

### 219 SWD detection

220 The analog EEG signal was acquired through a 4-channels differential pre-amplifier (high-  
221 pass filter 0.1 Hz, SuperTech, Hungary) connected to a 4-channel BioAmp amplifier (1000  
222 gain, low-pass filter 500 Hz, SuperTech, Hungary) and digitized at 1000 Hz using a CED  
223 Mk3 1401 (Cambridge Electronic Design, UK). SWDs were initially detected semi-  
224 automatically using the SeizureDetect script (kindly provided by Steve Clifford, CED) in  
225 Spike2 v7.03 (Cambridge Electronic Design, UK), and then checked by visual inspection.  
226 Data were digitally processed and an interictal EEG period of wakefulness was manually  
227 selected and used to set a threshold of  $\pm 5-8$  SD of the baseline EEG. To identify SWDs, all  
228 crossings above or below the threshold were then grouped into bursts according to five pre-  
229 set parameters: a maximum onset interval (0.2s), a maximum interval (0.75 s), a minimum  
230 number of spikes (5), a minimum interval within bursts (1 s) and a minimum duration (0.6 s).  
231 Identified bursts lasting less than 1 second were discarded. The putative bursts were  
232 ultimately classified into SWDs according to the frequency, which was manually set between  
233 5 and 12 Hz to exclude deep sleep epochs or artefacts. This semi-automatic detection was  
234 further refined by visual inspection. The following parameters were extracted from the EEG  
235 data in 20 min epochs: the total time spent in seizure, the total number of seizures and the  
236 average duration of a seizure. Treatment data were normalized to the respective control  
237 period and statistical analysis performed after normalization (see Statistical Analysis).

238

### 239 Power spectral analysis

240 The Welch power spectral density analysis was performed with MATLAB (R2019a,  
241 MathWorks, USA) on interictal EEG periods which were devoid of ASs in GAERS treated

242 oral administration of IVA and other drug combinations. Change of power spectrum density  
243 between control and treatment periods were measured as baseline percentage. Statistical  
244 analysis was performed after normalization to the respective control period (see Statistical  
245 Analysis). Similar power spectra were performed on the EEG of GAERS that received IVA  
246 directly in the CIN and VB, and compared to VEH injection.

247

#### 248 Cortical and thalamic slice preparation, whole-cell recordings and data analysis

249 Male Wistar and GAERS rats (both 25-35 days-old) were anesthetized (ketamine/xylazine:  
250 80/8 mg/kg), their brains quickly sliced (320  $\mu\text{m}$  thickness) in the coronal plane, and slices  
251 containing either the CIN or the VB were incubated at room temperature (20°C) in aCSF  
252 containing (in mM): 130 NaCl, 3.5 KCl, 1  $\text{NaH}_2\text{PO}_4$ , 24  $\text{NaHCO}_3$ , 1  $\text{CaCl}_2$ , 3  $\text{MgSO}_4$ , 10  
253 glucose. For recording, slices were submerged in a chamber perfused with a warmed (35°C)  
254 continuously oxygenated (95%  $\text{O}_2$ , 5%  $\text{CO}_2$ ) aCSF containing (in mM): 130 NaCl, 3.5 KCl, 1  
255  $\text{KH}_2\text{PO}_4$ , 24  $\text{NaHCO}_3$ , 1  $\text{MgSO}_4$ , 2  $\text{CaCl}_2$ , and 10 glucose.

256 Whole-cell patch-clamp recordings were performed using a Heka EPC9 amplifier (Heka  
257 Elektronik). Patch pipettes (tip resistance: 4–5  $\text{M}\Omega$ ) were filled with an internal solution  
258 containing the following (in mM): 126 K-gluconate, 4 KCl, 4 ATP-Mg, 0.3 GTP- $\text{Na}_2$ , 10  
259 HEPES, 10 kreatin-phosphate (pH 7.25, osmolarity 275 mOsm. The liquid junction potential  
260 (-13 mV) was corrected offline. Access and series resistances were constantly monitored, and  
261 data from neurons with a >20% change from the initial value were discarded. Action  
262 potential amplitude was measured from threshold (20 mV/ms on the first derivative of the  
263 membrane potential) to the peak of the action potential. Analysis of these whole-cell data was  
264 performed using custom routines written in Igor.

265

## 266 Statistical analysis

267 Statistical analysis was performed using GraphPad Prism version 9.0 (GraphPad Software,  
268 San Diego, USA). Normality of the data was verified using the QQ plot. The comparison  
269 between the two doses of ELA was performed using an unpaired t-test assuming equal  
270 variances between the two groups. The effect of each treatment on SWDs following systemic  
271 injection was assessed by repeated-measurements (RM) two-way-Analysis of Variance  
272 (ANOVA) using Sidak correction for multiple comparisons. The main effect of treatment vs  
273 vehicle was also measured as area-under-the-curve (AUC) and analysed with one-way-  
274 ANOVA using Dunnett's multiple comparisons test. Statistical analysis of the power spectra  
275 was carried out with one-sided Wilcoxon test comparing treatment with control. The main  
276 effect of IVA vs aCSF for CIN and VB microinjections was assessed by two-way ANOVA  
277 for multiple timepoints and unpaired *t*-test for AUC. Data from *in vitro* recordings in cortical  
278 and thalamic neurons were analysed with Wilcoxon signed ranks test.

279 All quantitative data in the text and figures are reported as mean $\pm$ SEM, unless stated  
280 otherwise.

281

## 282 Drugs

283 IVA (3-[3-({[(7S)-3,4-dimethoxybicyclo[4.2.0]octa-1,3,5-trien-7-yl]methyl})(methyl amino)  
284 propyl]-7,8-dimethoxy-2,3,4,5-tetrahydro-1H-3-benzazepin-2-one hydrochloride)) and ELA  
285 (N-[4-[2-(3,4-Dihydro-6,7-dimethoxy-2(1H)-isoquinoliny)ethyl]phenyl]-9,10-dihydro-5-  
286 methoxy-9-oxo-4-acridinecarboxamide) were purchased from Sigma-Aldrich. For systemic  
287 injections, IVA was dissolved in a 5% D-glucose (Sigma Aldrich) solution and the pH  
288 adjusted to 4. ELA was dissolved in 10% Hydroxypropyl- $\beta$ -cyclodextrin and the pH adjusted

289 to 4. For local microinjections, IVA was diluted in aCSF. All drugs were freshly prepared on  
290 each day of experiments.

291

292 Results

293 *Systemic injection of IVA*

294 The highest dose of IVA (30 mg/kg) used in this study was selected on the basis of its  
295 efficacy and safety as described in previous EMA and FDA reports.<sup>27,28</sup> For selecting a dose  
296 of ELA that could lead to suitable brain levels of IVA, we tested two doses of ELA that had  
297 been previously reported to allow good brain penetration of other systemically dosed Pgp  
298 substrates.<sup>39</sup> Intravenous pre-treatment of Wistar rats with 5 mg/kg ELA provided higher  
299 brain concentration of orally administered IVA ( $622 \pm 107$  ng/g,) compared to 2.5 mg/kg ELA  
300 ( $259 \pm 57.6$  ng/g,  $p=0.018$ ) (**Figure 1A**). Similarly, the brain free concentration of IVA was  
301 higher in animals pre-treated with 5 mg/kg than 2.5 mg/kg ELA ( $307 \pm 53.0$  and  $128 \pm 28.4$   
302 nM, respectively,  $p=0.018$ ), showing a direct correlation with the total drug concentration  
303 (**Figure 1B**). No significant differences in the IVA plasma levels were observed in animals  
304 pre-treated with 2.5 and 5 mg/kg ELA ( $p=0.603$ ) (**Figure 1A, B**). A dose of 5 mg/kg of ELA  
305 was thus used in further experiments.

306 We next investigated the effect of orally administered IVA on spontaneous ASs in freely  
307 moving GAERS. No gross behavioural changes were observed in any treatment group during  
308 the EEG recordings described below. As shown in **Figure 2A**, in animals pre-treated with 5  
309 mg/kg ELA, oral administration of 20 and 30 (but not 10) mg/kg IVA markedly reduced  
310 spontaneous ASs, an effect that for the highest dose was visible as early as 20 min after IVA  
311 administration and lasted for the entire duration of the recorded period (2 hours). Statistical  
312 analysis of the normalized area-under-the-curve (AUC) of the entire test period showed a  
313 significant reduction (62%) of the total time spent in seizures for the ELA+IVA30 group  
314 ( $0.38 \pm 0.09$ ,  $F=8.77$ ,  $DFn=5$ ,  $DFd=22$ ,  $p=0.0044$ ), but not for the ELA+IVA20  
315 ( $0.53 \pm 0.09$ ,  $p=0.07$ ), ELA+IVA10 ( $1.05 \pm 0.09$ ,  $p>0.99$ ), ELA+VEH2 ( $1.2 \pm 0.16$ ,  $p=0.61$ ) and

316 VEH1+IVA groups ( $1.12 \pm 0.11$ ,  $p=0.86$ ) compared to VEH1+VEH2 (**Figure 2B1**). The mean  
317 duration of the seizures was also significantly decreased ( $F=6.67$ ,  $DFn=5$ ,  $DFd=22$ , 41%) in  
318 the ELA+IVA30 group ( $0.59 \pm 0.07$ ,  $p=0.008$ ), but not for ELA+IVA20 ( $0.66 \pm 0.09$ ,  $p=0.09$ ),  
319 ELA+IVA10 ( $1.03 \pm 0.1$ ,  $p>0.99$ ), ELA+VEH2 ( $1.06 \pm 0.08$ ,  $p>0.99$ ) and VEH1+IVA groups  
320 ( $1.06 \pm 0.09$ ,  $p=0.95$ ) compared to VEH1+VEH2 (**Figure 2B2**). Moreover, the number of  
321 seizures showed a significant decrease (45%) in rats treated with ELA+IVA30 ( $0.55 \pm 0.09$ ,  
322  $F=4.35$ ,  $DFn=5$ ,  $DFd=46$ ,  $p=0.01$ ) but not for ELA+IVA20 ( $0.71 \pm 0.09$ ,  $p=0.24$ ),  
323 ELA+IVA10 ( $0.99 \pm 0.09$ ,  $p>0.99$ ), ELA+VEH2 ( $1.08 \pm 0.13$ ,  $p=0.98$ ) and VEH1+IVA groups  
324 ( $1.03 \pm 0.06$ ,  $p=0.99$ ) compared to VEH1+VEH2 (**Figure 2B3**). Finally, power spectra of the  
325 interictal EEG showed the administration of ELA+IVA30 to elicit a significant increase in  
326 the power of theta (4-8 Hz) and low gamma (30-50 Hz) frequency bands compared to the  
327 VEH1+VEH2 group and a small decrease in the alpha band (8-14 Hz) (**Figure 2C**).

328 At the end of the last recording session, the brain and plasma of those rats that had received  
329 ELA+IVA30 or VEH+IVA30 as their last treatment were collected to determine the IVA  
330 plasma and brain levels. As shown in **Figure 1C**, the total plasma concentrations of IVA  
331 measured 2 hours after dosing were in the same range in the two treatment groups  
332 (VEH1+IVA30:  $107 \pm 19$  ng/ml; ELA+IVA30  $212 \pm 39$  ng/ml) while the brain concentration  
333 was substantially higher in the animals that were dosed with ELA-IVA30 ( $373 \pm 137$  ng/g)  
334 compared to those with VEH1+IVA30 ( $9.5 \pm 0.3$  ng/g). The free brain concentration of IVA  
335 was  $4.7 \pm 0.1$  nM for VEH1+IVA30 and  $184 \pm 67.8$  nM for the ELA+IVA30 group (**Figure**  
336 **1D**).

337

338 *Local microinjection of IVA*

339 Since ASs are generated by abnormal firing in cortico-thalamo-cortical circuits, we next  
340 investigated whether the anti-absence effect of systemically administered IVA was mediated  
341 by an action on thalamic and/or cortical regions. Thus, we applied IVA by bilateral  
342 microinjection in the VB or CIN of freely moving GAERS.

343 Bilateral microinjection of IVA (6 nmoles) in the VB of freely moving GAERS reduced ASs  
344 compared to VEH injection (**Figure 3A**). Statistical analysis of the AUC of the entire test  
345 period showed a significant reduction (40%,  $F=2.61$ ,  $DFn=6$ ,  $DFd=4$ ,  $p=0.05$ ) of the total  
346 time spent in seizures of IVA ( $0.6\pm 0.09$ ) compared to VEH (**Figure 3B1**). The number of  
347 seizures decreased (29%,  $F=2.99$ ,  $DFn=6$ ,  $DFd=4$ ,  $p=0.011$ ) in rats treated with IVA  
348 ( $0.71\pm 0.05$ ) compared to VEH (**Figure 3B2**), but the mean duration of seizures was  
349 unchanged (5%,  $F=1.39$ ,  $DFn=6$ ,  $DFd=4$ ,  $p=0.72$ ) ( $0.95\pm 0.12$ ) (**Figure 3B3**).

350 Microinjection of IVA (6 nmoles) in the CIN abolished ASs even in the first 20 min period  
351 after microinjection, and the effect lasted for the entire 2-hour of the post-treatment recording  
352 period (**Figure 4A,C1**). The AUC of the total time spent in seizures after IVA ( $0.04\pm 0.03$ )  
353 microinjection was 96% ( $F=6.23$ ,  $DFn=4$ ,  $DFd=4$ ,  $p<0,0001$ ) smaller than that of VEH  
354 (**Figure 4C1**). Notably, the CIN injection of IVA elicited small-amplitude waves (with no  
355 spikes) at 4-7 Hz (**Fig. 4A,B**): these EEG oscillations were not the electrographic expression  
356 of ASs since they were not accompanied by motor arrest and the rats kept moving around the  
357 cage during this EEG activity. The number of seizures showed a 91% ( $F=4.57$ ,  $DFn=4$ ,  
358  $DFd=4$ ,  $p<0,0001$ ) decrease in rats treated with IVA ( $0.09\pm 0.04\%$  compared to VEH)  
359 (**Figure 4C2**). Likewise, the mean duration of the seizures was also decreased by 81%  
360 ( $F=1.79$ ,  $DFn=4$ ,  $DFd=4$ ,  $p=0,0002$ ) after IVA administration ( $0.19\pm 0.08\%$  compared to  
361 VEH) (**Figure 4C3**).

362



363 *Effect of IVA on cortical and thalamic neuron properties*

364 Since the cellular effects of IVA in neurons of key brain areas for AS generation has not been  
365 studied either in normal non-epileptic animals and in GAERS, we investigated the ability of  
366 this drug to block HCN channel-mediated membrane properties of Wistar cortical layer 5/6  
367 pyramidal neurons (Fig. 5B) and GAERS VB thalamocortical neurons (Fig. 5F) in brain  
368 slices. IVA (3  $\mu$ M) blocked the characteristic depolarizing sag elicited in these neurons by  
369 hyperpolarizing current pulses (**Figure 5A,C,E,G**). Furthermore, IVA hyperpolarized the  
370 membrane potential of both neuronal types (**Figure 5D,H**) and decreased the number of  
371 action potentials evoked by a low-threshold spike in thalamocortical and cortical neurons  
372 (VB: control  $5.3 \pm 0.8$ , IVA  $4.5 \pm 0.9$ ,  $n=10$ ,  $p<0.05$ ; CIN: control  $2.5 \pm 0.28$ , IVA  $1.0 \pm 0.4$ ,  $n=6$ ,  
373  $p<0.05$ ). In contrast, IVA had no effect on the number of action potentials evoked by  
374 depolarizing current pulses (VB: control  $7.9 \pm 0.4$ , IVA  $7.6 \pm 0.6$ ,  $n=10$ ,  $p>0.05$ ; CIN:  
375 control  $4.6 \pm 0.2$ , IVA  $4.5 \pm 0.2$ ,  $n=6$ ,  $p>0.05$ ), and the action potential amplitude (VB: control:  
376  $71.2 \pm 6.8$  mV, IVA  $71.4 \pm 6.5$  mV,  $n=11$ ,  $p > 0.05$ ; CIN: control:  $78.05 \pm 4.75$ , IVA  $80.51 \pm 5.32$ ,  
377  $n=6$ ,  $p>0.05$ ) and threshold (VB: control  $-51.3 \pm 3.3$  mV, IVA  $-51.7 \pm 2.7$  mV,  $n=11$ ,  $p>0.05$ ;  
378 CIN: control :  $-43.7 \pm 2.3$  mV, IVA  $-42.6 \pm 2.2$  mV,  $n=6$ ,  $p>0.05$ ), indicating that the effect of  
379 this drug is selective on HCN channel-mediated membrane properties in both Wistar CIN  
380 cortical layer 5/6 pyramidal and GAERS VB thalamocortical neurons.

381

382

383

384 **Discussion**

385 Our study provides the first demonstration of the potent anti-absence action of systemic  
386 administration of the HCN channel blocker, IVA. Moreover, this drug abolishes and reduces  
387 ASs when microinjected directly in the CIN and VB, respectively, an action mediated by its  
388 ability to decrease  $I_h$ -dependent properties of CIN layer 5/6 pyramidal and VB  
389 thalamocortical neurons *in vitro*.

390 Targeting brain HCN channels *in vivo* has been a major challenge due to the inability of  
391 available HCN channel-acting drugs to cross the BBB and provide long-lasting CNS effects.  
392 Here, by inhibiting Pgp with ELA,<sup>34,39,40</sup> we achieved substantial IVA brain concentrations  
393 even 2 hours after oral administration to affect physiological brain rhythms, i.e. interictal  
394 alpha, theta and gamma waves, and pathological activity, i.e. ASs. Indeed, in the absence of  
395 ELA pre-treatment, IVA failed to alter normal and paroxysmal brain oscillations. Notably,  
396 the block of Pgp by ELA also allowed for the fast anti-absence action of orally administered  
397 IVA observed in this study. In contrast, IVA decreased pharmacologically and electrically  
398 induced convulsive seizures without pre-treatment with a drug capable of improving its brain  
399 absorption.<sup>31-33</sup> IVA brain and plasma levels were not measured in these studies, and given  
400 our results and previous evidence of IVA inability to substantially penetrate the brain,<sup>27-30</sup> it  
401 is at present difficult to explain the IVA anti-convulsant action reported in the above studies.

402 The anti-absence effect of IVA injected in the VB and the CIN confirm previous results of  
403 the critical role of thalamic and cortical HCN channels in ASs<sup>17-20,25</sup>. The effect of IVA  
404 injected in the CIN is markedly stronger than the one following oral administration, while  
405 IVA injection in the VB shows a small reduction. In contrast, microdialysis injection in the  
406 VB of ZD7288, another HCN channel blocker, has a strong anti-absence action.<sup>25</sup> Though

407 differences in drug-potency may explain this difference, a much larger portion of the VB is  
408 undoubtedly affected by continuous 2 hours ZD7288 microdialysis<sup>41</sup> compared to the more  
409 localized 2 min IVA microinjected bolus used in the present study.

410 Our investigation also provides the first *in vivo* evidence that whole-brain block of HCN  
411 channels affects normal brain oscillations, specifically the interictal increase in theta and  
412 gamma band power and a shift of the peak of the theta frequency band. Theta and gamma  
413 oscillations have been previously linked to  $I_h$  and ASs<sup>42,43</sup> and broad changes in cortico-  
414 thalamo-cortical firing dynamics induced by blocking  $I_h$  might underlie both the AS block  
415 and changes in interictal oscillations. Moreover, IVA injected in the CIN elicits small-  
416 amplitude waves (with no-spikes) at theta frequency (4-7 Hz). The mechanism and patho-  
417 physiological significance of all waves induced by systemic and intra-CIN injection of IVA  
418 remain to be established.

419 IVA modulates  $I_h$ -dependent membrane properties of Wistar cortical layer 5/6 pyramidal  
420 neurons in the CIN and GAERS thalamocortical neurons in the VB, i.e. the depolarizing sag  
421 and the resting membrane potential, leaving other membrane properties unaffected, i.e. action  
422 potential threshold and amplitude. As tonic firing was not affected by IVA, the decrease of  
423 action potential number evoked by low-threshold spikes of thalamocortical neurons can be  
424 explained by the smaller  $I_h$ -tail current in the presence of IVA providing a smaller  
425 depolarizing contribution to low-threshold spikes which in turn generate fewer action  
426 potentials.

427 Our study represents the first proof of principle that whole-brain pharmacological block of  
428 HCN channels has an anti-absence action, and demonstrate for the first time that reduction of  
429 HCN function selectively in the CIN abolishes ASs, i.e. HCN channels of the CIN are  
430 necessary for AS generation. HCN1 channels are more abundantly expressed in cortex than

431 thalamus, while HCN2 and HCN4 predominate in thalamocortical neurons.<sup>24,47-51</sup> Thus,  
432 though IVA is a non-selective inhibitor of HCN channel isoforms, it is likely that HCN1 may  
433 be the isoform underlying its action in the CIN, whereas its VB effects may involve an  
434 interplay between HCN2 and HCN4. Notably, in normal non-epileptic animals, VB-selective  
435 knockdown of HCN4 does not elicit ASs, whereas VB-selective HCN2 knockdown, as well  
436 as global HCN2<sup>16</sup> or HCN1<sup>15</sup> knockout, lead to ASs, suggesting an anti-absence role of both  
437 isoforms. In contrast, our previous study<sup>25</sup> and the present investigation demonstrate that a  
438 genetic and pharmacological block of HCN channels in the VB of different mouse and rat  
439 models decreases ASs. Possible explanations of these contradictory results include  
440 compensatory changes in the full HCN1 and HCN2 KO mice, different species used,  
441 different potency of HCN blockers against HCN channel subtypes and diverse  
442 efficacy/selectivity of genetic versus pharmacological means of manipulating HCN channels.  
443 The alternative interpretation we suggest here is that 1) in normal animals thalamic HCN2  
444 have an anti-absence effect<sup>23</sup> and thalamic HCN4 a pro-absence action<sup>24,45</sup> and 2) in epileptic  
445 animals there is an increased contribution of HCN4, with respect to HCN2, to the total  $I_h$  of  
446 thalamocortical neurons. Under this hypothesis, in non-epileptic animals VB-selective  
447 knockdown of HCN2 elicit ASs and VB-selective knockdown of HCN4 does not.<sup>23,24</sup> In  
448 genetic AS models, a pharmacological or genetic block of all subtypes of thalamic HCN  
449 channels would lead to an anti-absence effect.<sup>25</sup> In support of our hypothesis, i) in thalamic  
450 slices of HCN4 KO mice there is a reduction in electrically evoked intrathalamic oscillations  
451 (which are considered a proxy of thalamic rhythmic paroxysmal activity)<sup>24</sup>, and ii) an  
452 increased  $I_h$  is present in VB thalamocortical neurons of GAERS<sup>20</sup> and of normal mice which  
453 develop atypical AS following a cortical infarct.<sup>46</sup> This increased  $I_h$  may result from  
454 enhanced HCN channel expression,<sup>17</sup> or from changes in the modulation of this current by  
455 intracellular messengers (e.g. cAMP)<sup>49</sup> and neurotransmitters (e.g. noradrenaline).<sup>50</sup> Notably,

456 our hypothesis makes the testable predictions that in AS models a selective block of thalamic  
457 HCN4 and HCN2 channels should have an anti-absence and no effect on ASs, respectively.

458 In conclusion, acute systemic administration and cortical injection of the HCN channel  
459 blocker IVA abolishes genetically determined ASs in a well-established rat model. Selective  
460 blockers of HCN channel isoforms, that potentially do not elicit the other changes in EEG  
461 oscillations observed here with IVA may represent lead-compounds for future anti-absence  
462 drugs.

463

464

465 *'We confirm that we have read the Journal's position on issues involved in ethical*  
466 *publication and affirm that this report is consistent with those guidelines.'*

467

468

469 **Key Points Box**

470       • Systemic administration of Ivabradine prevents absence seizures by blocking neuronal

471       HCN channels

472       • Ivabradine injected in the cortical initiation network abolishes absence seizures

473       whereas its anti-absence effect is smaller when injected in the ventrobasal thalamus

474       • HCN channel blockade by Ivabradine affects membrane properties of cortical layer

475       5/6 pyramidal and thalamocortical neurons

476

477

478 **Figure 1. Brain and plasma levels of systemically injected ivabradine with and without**  
479 **pre-treatment with elacridar.**

480 **A,B.** Total brain (black dots) and plasma (white dots) levels (**A**) and brain and plasma free  
481 concentrations (**B**) measured 1 hour after oral administration of Ivabradine (IVA) (30 mg/kg)  
482 in Wistar rats (N=5 each group) that had been pre-treated with intravenous injection of either  
483 2.5 or 5 mg/kg Elacridar (ELA) 30 min before IVA injection. **C,D.** Total brain (black dots)  
484 and plasma (white dots) levels (**C**) and brain and plasma free concentrations (**D**) of IVA in  
485 GAERS rats treated with VEH1+IVA (N=2) or ELA (5mg/kg) + IVA (N=4). Animals were  
486 sacrificed at the end of the EEG recordings, i.e. 2 hours after IVA injection. In **A-D**,  
487 horizontal and vertical lines indicate mean and  $\pm$ SEM, respectively.

488

489

490 **Figure 2. Oral administration of ivabradine markedly blocks ASs.**

491 **A.** Representative EEG traces of four different freely moving GAERS injected with either  
492 VEH1+VEH2, VEH1+IVA, ELA+VEH2, ELA+IVA10, ELA+IVA20 and ELA+IVA30.  
493 Note the marked reduction in SWDs in the ELA+IVA30 group compared to all other groups  
494 (a typical SWD is shown enlarged in the top trace on the right). In **A** and the left plots of **B1-**  
495 **3**, interruption in the traces is due to the animals being disconnected from the EEG wires for  
496 drug administration: ELA (or VEH1) was injected at time -20 min and IVA (or VEH2) at  
497 time 0 (indicated by the black arrow). Data in **B1-3** are normalized to the control period (see  
498 methods). **B1.** Time-response curves (left graph) and area under the curve (AUC) of the  
499 whole treatment period (right graph) of the total time spent in seizures for VEH1+VEH2  
500 (black, N=9), ELA+VEH2 (red, N=9), VEH1+IVA (orange, N=9), ELA+IVA10 (green,  
501 N=6), ELA+IVA20 (blue, N=8) and ELA+IVA (ochre, N=11) groups ( \*p<0.05, \*\*p < 0.01,  
502 \*\*\*p<0.005, \*\*\*\*p<0.001) (colour-code and number of animals as in **B3**). **B2.** Time-  
503 response curve (left graph) and AUC (right graph) of the whole treatment period of seizure  
504 duration for the six treatment groups ( \*p<0.05, \*\*p < 0.01, \*\*\*p<0.005, \*\*\*\*p<0.001). **B3.**  
505 Time-response curve (left graph) and AUC (right graph) of the whole treatment period of the  
506 number of seizures for the six treatment groups ( \*p<0.05, \*\*p < 0.01, \*\*\*p<0.005,  
507 \*\*\*\*p<0.001). **E.** Left graph: Average normalized interictal power spectra of the four  
508 treatment groups (number of animals as in **B3**, except VEH1+VEH2 N=6). Horizontal bars  
509 on top indicate statistical significance (thin line: p < 0.05; thick line: p < 0.01). Right:  
510 representative examples of interictal power spectra for individual animals of the  
511 VEH1+VEH2 (black), ELA+VEH2 (red), VEH1+IVA (orange) and ELA+IVA30 (ochre)  
512 groups showing both the control period (dashed black line) and the treatment period.

513



514

515 **Figure 3. Effect of intrathalamic injection of ivabradine on ASs.**

516 **A.** Representative EEG traces of two freely moving GAERS injected in the VB with aCSF or  
517 IVA. In **A** and left graphs of **B1-3**, the break in the traces indicates the period of time when  
518 the EEG wires were disconnected to allow the exchange of the aCSF with the IVA solution in  
519 the injection cannula. aCSF and IVA (6 nmoles/site) were injected using a flow rate of 0.25  
520  $\mu\text{l}/\text{min}$  for 2 min. In **B1-3**, data are normalized to the control period. **B1.** Time-response  
521 curves (left graph) and area under the curve (AUC) of the whole treatment period (right plot)  
522 of the total time spent in seizures for aCSF (black, N=7) and IVA (ochre, N=5) injected  
523 animals (\* $p < 0.05$ , \*\* $p < 0.01$ , \*\*\* $p < 0.005$ , \*\*\*\* $p < 0.001$ ). **B2.** Time-response curves (left graph)  
524 and AUC of the whole treatment period (right plot) of seizure number of aCSF and IVA  
525 treated group (colour-code and number of animals as in **B1**) (\* $p < 0.05$ , \*\* $p < 0.01$ , \*\*\* $p < 0.005$ ,  
526 \*\*\*\* $p < 0.001$ ). **B3.** Time-response curves (left graph) and AUC of the whole treatment period  
527 (right plot) of seizure duration for aCSF and IVA treated animals (colour-code and number  
528 of animals as in **B1**).

529

530

531 **Figure 4. Effect of intra-CIN injection of ivabradine on ASs.**

532 **A.** Representative EEG traces of two freely moving GAERS injected in the CIN with aCSF  
533 or IVA. In **A** and left graphs of **C1-3**, the break in the traces indicates the period of time  
534 when the EEG wires were disconnected to allow the exchange of the aCSF with the IVA  
535 solution in the injection cannula. aCSF and IVA (6 nmoles/side) were injected using a flow  
536 rate of 0.25  $\mu$ l/min for 2 min. In **C1-3**, data are normalized to the control period. **B.** Average  
537 power spectra of intra-CIN injected vehicle and IVA (number of animals and colour code as in **C1**).  
538 Example of the 4-7 Hz EEG waveform evoked by IVA is shown on top). **C1.** Time-response curves  
539 (left graph) and area under the curve (AUC) of the whole treatment period (right plot) of the  
540 total time spent in seizures for aCSF (black, N=5) and IVA (ochre, N=5) injected animals  
541 (\* $p$ <0.05, \*\* $p$  < 0.01, \*\*\* $p$ <0.005, \*\*\*\* $p$ <0.001). **C2.** Time-response curves (left graph) and  
542 AUC of the whole treatment period (right plot) of seizure number of aCSF and IVA treated  
543 group (colour-code and number of animals as in **C1**) (\* $p$ <0.05, \*\* $p$  < 0.01, \*\*\* $p$ <0.005,  
544 \*\*\*\* $p$ <0.001). **C3.** Time-response curves (left graph) and AUC of the whole treatment period  
545 (right plot) of seizure duration for aCSF and IVA treated animals (\* $p$ <0.05, \*\* $p$  < 0.01,  
546 \*\*\* $p$ <0.005, \*\*\*\* $p$ <0.001) (colour-code and number of animals as in **C1**).

547

548

549

550 **Figure 5. Effect of Ivabradine on the membrane properties of CIN layer 5/6 pyramidal**  
551 **and VB thalamocortical neurons *in vitro*.**

552 **A.** Representative voltage responses of a Wistar CIN layer 5 pyramidal neuron to a  
553 hyperpolarizing and depolarizing current step (-200 and 80 pA, respectively) before (control)  
554 and during application of 30  $\mu$ M Ivabradine (IVA) (membrane potential: -58 mV). Note the  
555 decreased depolarizing sag in the presence of IVA. **B.** Photomicrograph of the cortical layer 5  
556 neuron from which the electrical recordings shown in **A** were made. Scale bar: 50  $\mu$ m. **C.**  
557 Plot of sag amplitude versus injected current show a decrease of the sag in the presence of  
558 IVA that is significant for the largest injected currents. **D.** Resting membrane potential in  
559 control conditions and in the presence of ivabradine. Large symbols indicate mean  $\pm$  SEM. **E.**  
560 Representative voltage responses of a GAERS VB thalamocortical neuron to a  
561 hyperpolarizing and depolarizing current step (-200 and 80 pA, respectively) before (control)  
562 and during application of 30  $\mu$ M Ivabradine (IVA) (membrane potential: -61 mV). Note the  
563 decreased depolarizing sag in the presence of IVA. **F.** Photomicrograph of the  
564 thalamocortical neuron from which the electrical recordings shown in **E** were made. Scale  
565 bar: 50  $\mu$ m. **G.** Plot of sag amplitude versus injected current show a decrease of the sag in the  
566 presence of IVA that is significant for the largest injected currents ( $p < 0.05$ ). **H.** Resting  
567 membrane potential in control conditions and in the presence of ivabradine. Large symbols  
568 indicate mean  $\pm$  SEM.

569

570

571 **References**

572

- 573 1. Fisher RS, Cross JH, D’Souza C, French JA, Haut SR, Higurashi N, et al. Instruction  
574 manual for the ILAE 2017 operational classification of seizure types. *Epilepsia*. 2017;  
575 58(4):531–42.
- 576 2. Fisher RS, Cross JH, French JA, Higurashi N, Hirsch E, Jansen FE, et al. Operational  
577 classification of seizure types by the International League Against Epilepsy: Position  
578 Paper of the ILAE Commission for Classification and Terminology. *Epilepsia*. 2017;  
579 58(4):522–30.
- 580 3. Berg AT, Shinnar S, Levy SR, Testa FM, Smith-Rapaport S, Beckerman B. How Well  
581 Can Epilepsy Syndromes Be Identified at Diagnosis? A Reassessment 2 Years After  
582 Initial Diagnosis. *Epilepsia*. 2000; 41(10):1269–75.
- 583 4. Vega C, Guo J, Killory B, Danielson N, Vestal M, Berman R, et al. Symptoms of  
584 anxiety and depression in childhood absence epilepsy. *Epilepsia*. 2011; 52(8):e70–4.
- 585 5. Nickels K. Seizure and Psychosocial Outcomes of Childhood and Juvenile Onset  
586 Generalized Epilepsies: Wolf in Sheep’s Clothing, or Well-Dressed Wolf? *Epilepsy*  
587 *Curr*. 2015; 15(3):114–7.
- 588 6. Glauser TA, Cnaan A, Shinnar S, Hirtz DG, Dlugos D, Masur D, et al. Ethosuximide,  
589 Valproic Acid, and Lamotrigine in Childhood Absence Epilepsy. *N Engl J Med*. 2010;  
590 362(9):790–9.
- 591 7. Glauser TA, Cnaan A, Shinnar S, Hirtz DG, Dlugos D, Masur D, et al. Ethosuximide,  
592 valproic acid, and lamotrigine in childhood absence epilepsy: Initial monotherapy  
593 outcomes at 12 months. *Epilepsia*. 2013; 54(1):141–55.

- 594 8. Cnaan A, Shinnar S, Arya R, Adamson PC, Clark PO, Dlugos D, et al. Second  
595 monotherapy in childhood absence epilepsy. *Neurology*. 2017; 88(2):182–90.
- 596 9. Kessler SK, McGinnis E. A Practical Guide to Treatment of Childhood Absence  
597 Epilepsy. *Pediatr Drugs*. 2019; 21(1):15–24.
- 598 10. Shinnar RC, Shinnar S, Cnaan A, Clark P, Dlugos D, Hirtz DG, et al. Pretreatment  
599 behavior and subsequent medication effects in childhood absence epilepsy. *Neurology*.  
600 2017; 89(16):1698–706.
- 601 11. Masur D, Shinnar S, Cnaan A, Shinnar RC, Clark P, Wang J, et al. Pretreatment  
602 cognitive deficits and treatment effects on attention in childhood absence epilepsy.  
603 *Neurology*. 2013; 81(18):1572–80.
- 604 12. Dibbens LM, Reid CA, Hodgson B, Thomas EA, Phillips AM, Gazina E, et al.  
605 Augmented currents of an HCN2 variant in patients with febrile seizure syndromes.  
606 *Ann Neurol*. 2010; 67(4):542–6.
- 607 13. Nava C, Dalle C, Rastetter A, Striano P, de Kovel CGF, Nabbout R, et al. De novo  
608 mutations in HCN1 cause early infantile epileptic encephalopathy. *Nat Genet*. 2014;  
609 46(6):640–5.
- 610 14. DiFrancesco JC, Barbuti A, Milanesi R, Coco S, Bucchi A, Bottelli G, et al. Recessive  
611 Loss-of-Function Mutation in the Pacemaker HCN2 Channel Causing Increased  
612 Neuronal Excitability in a Patient with Idiopathic Generalized Epilepsy. *J Neurosci*.  
613 2011; 31(48):17327–37.
- 614 15. Nishitani A, Kunisawa N, Sugimura T, Sato K, Yoshida Y, Suzuki T, et al. Loss of  
615 HCN1 subunits causes absence epilepsy in rats. *Brain Res*. 2019; 1706(August  
616 2018):209–17.

- 617 16. Ludwig A. Absence epilepsy and sinus dysrhythmia in mice lacking the pacemaker  
618 channel HCN2. *EMBO J.* 2003; 22(2):216–24.
- 619 17. Budde T. Impaired Regulation of Thalamic Pacemaker Channels through an Imbalance  
620 of Subunit Expression in Absence Epilepsy. *J Neurosci.* 2005; 25(43):9871–82.
- 621 18. Kuisle M, Wanaverbecq N, Brewster AL, Frère SGA, Pinault D, Baram TZ, et al.  
622 Functional stabilization of weakened thalamic pacemaker channel regulation in rat  
623 absence epilepsy. *J Physiol.* 2006; 575(1):83–100.
- 624 19. Kole MHP, Bräuer AU, Stuart GJ. Inherited cortical HCN1 channel loss amplifies  
625 dendritic calcium electrogenesis and burst firing in a rat absence epilepsy model. *J*  
626 *Physiol.* 2007; 578(2):507–25.
- 627 20. Cain SM, Tyson JR, Jones KL, Snutch TP. Thalamocortical neurons display  
628 suppressed burst-firing due to an enhanced I<sub>h</sub> current in a genetic model of absence  
629 epilepsy. *Pflügers Arch - Eur J Physiol.* 2015; 467(6):1367–82.
- 630 21. Crunelli V, Leresche N. Childhood absence epilepsy: Genes, channels, neurons and  
631 networks. *Nat Rev Neurosci.* 2002; 3(5):371–82.
- 632 22. Blumenfeld H. Cellular and Network Mechanisms of Spike-Wave Seizures. *Epilepsia.*  
633 2005; 46(s9):21–33.
- 634 23. Hammelmann V, Stieglitz MS, Hülle H, Le Meur K, Kass J, Brümmer M, et al.  
635 Abolishing cAMP sensitivity in HCN2 pacemaker channels induces generalized  
636 seizures. *JCI Insight.* 2019; 4(9).
- 637 24. Zobeiri M, Chaudhary R, Blaich A, Rottmann M, Herrmann S, Meuth P, et al. The  
638 Hyperpolarization-Activated HCN4 Channel is Important for Proper Maintenance of  
639 Oscillatory Activity in the Thalamocortical System. *Cereb Cortex.* 2019; 29(5):2291–

- 640 304.
- 641 25. David F, Çarçak N, Furdan S, Onat F, Gould T, Mészáros Á, et al. Suppression of  
642 Hyperpolarization-Activated Cyclic Nucleotide-Gated Channel Function in  
643 Thalamocortical Neurons Prevents Genetically Determined and Pharmacologically  
644 Induced Absence Seizures. *J Neurosci*. 2018; 38(30):6615–27.
- 645 26. Postea O, Biel M. Exploring HCN channels as novel drug targets. *Nat Rev Drug*  
646 *Discov*. 2011; 10(12):903–14.
- 647 27. U.S. Food and Drug Administration. Corlanor (Ivabradine)-U.S. Food and Drug  
648 Administration [Internet]. 2015. Available from:  
649 [https://www.accessdata.fda.gov/drugsatfda\\_docs/nda/2015/206143Orig1s000TOC.cfm](https://www.accessdata.fda.gov/drugsatfda_docs/nda/2015/206143Orig1s000TOC.cfm)
- 650 28. European Medicinal Agency. Procorolan (ivabradine) - European Medicine Agency.  
651 2005.
- 652 29. Savelieva I, Camm AJ. Novel If Current Inhibitor Ivabradine: Safety Considerations.  
653 In: *Heart Rate Slowing by If Current Inhibition*. Basel: KARGER; 2006. p. 79–96.
- 654 30. Santoro B, Shah MM. Hyperpolarization-Activated Cyclic Nucleotide-Gated Channels  
655 as Drug Targets for Neurological Disorders. *Annu Rev Pharmacol Toxicol*. 2020;  
656 60(1):109–31.
- 657 31. Łuszczki JJ, Prystupa A, Andres-Mach M, Marzęda E, Florek-Łuszczki M. Ivabradine  
658 (a hyperpolarization activated cyclic nucleotide-gated channel blocker) elevates the  
659 threshold for maximal electroshock-induced tonic seizures in mice. *Pharmacol Reports*.  
660 2013; 65(5):1407–14.
- 661 32. Sawicka KM, Wawryniuk A, Zwolak A, Daniluk J, Szpringer M, Florek-Luszczki M,  
662 et al. Influence of Ivabradine on the Anticonvulsant Action of Four Classical

- 663 Antiepileptic Drugs Against Maximal Electroshock-Induced Seizures in Mice.  
664 Neurochem Res. 2017; 42(4):1038–43.
- 665 33. Cavalcante TMB, De Melo J de MA, Lopes LB, Bessa MC, Santos JG, Vasconcelos  
666 LC, et al. Ivabradine possesses anticonvulsant and neuroprotective action in mice.  
667 Biomed Pharmacother. 2019; 109:2499–512.
- 668 34. Dash RP, Jayachandra Babu R, Srinivas NR. Therapeutic Potential and Utility of  
669 Elacridar with Respect to P-glycoprotein Inhibition: An Insight from the Published In  
670 Vitro, Preclinical and Clinical Studies. Eur J Drug Metab Pharmacokinet. 2017;  
671 42(6):915–33.
- 672 35. Depaulis A, David O, Charpier S. The genetic absence epilepsy rat from Strasbourg as  
673 a model to decipher the neuronal and network mechanisms of generalized idiopathic  
674 epilepsies. J Neurosci Methods. 2016; 260:159–74.
- 675 36. Meeren HKM, Pijn JPM, Van Luijtelaar ELJM, Coenen AML, Lopes da Silva FH.  
676 Cortical Focus Drives Widespread Corticothalamic Networks during Spontaneous  
677 Absence Seizures in Rats. J Neurosci. 2002; 22(4):1480–95.
- 678 37. Bundgaard C, Eneberg E, Sánchez C. P-glycoprotein differentially affects escitalopram,  
679 levomilnacipran, vilazodone and vortioxetine transport at the mouse blood-brain  
680 barrier in vivo. Neuropharmacology. 2016; 103:104–11.
- 681 38. George Paxinos and Charles Watson. The rat Brain. 4th ed. Academic Press; 1998.
- 682 39. Kallem R, P. Kulkarni C, Patel D, Thakur M, Sinz M, P. Singh S, et al. A Simplified  
683 Protocol Employing Elacridar in Rodents: A Screening Model in Drug Discovery to  
684 Assess P-gp Mediated Efflux at the Blood Brain Barrier. Drug Metab Lett. 2012;  
685 6(2):134–44.



- 686 40. Davis TP, Sanchez-Covarubias L, Tome ME. P-glycoprotein Trafficking as a  
687 Therapeutic Target to Optimize CNS Drug Delivery. 2014; :25–44.
- 688 41. David F, Schmiedt JT, Taylor HL, Orban G, Di Giovanni G, Uebele VN, et al.  
689 Essential Thalamic Contribution to Slow Waves of Natural Sleep. *J Neurosci*. 2013;  
690 33(50):19599–610.
- 691 42. Maheshwari A, Marks RL, Yu KM, Noebels JL. Shift in interictal relative gamma  
692 power as a novel biomarker for drug response in two mouse models of absence  
693 epilepsy. *Epilepsia*. 2016; 57(1):79–88.
- 694 43. Kocsis B, Li S. In vivo contribution of h-channels in the septal pacemaker to theta  
695 rhythm generation. *Eur J Neurosci*. 2004; 20(8):2149–58.
- 696 44. Manning J-P., Richards D., Leresche N, Crunelli V, Bowery N. Cortical-area specific  
697 block of genetically determined absence seizures by ethosuximide. *Neuroscience*  
698 [Internet]. 2004; 123(1):5–9. Available from:  
699 <https://linkinghub.elsevier.com/retrieve/pii/S0306452203007462>
- 700 45. Gülhan Aker R, Tezcan K, Çarçak N, Sakallı E, Akın D, Onat FY. Localized cortical  
701 injections of ethosuximide suppress spike-and-wave activity and reduce the resistance  
702 to kindling in genetic absence epilepsy rats (GAERS). *Epilepsy Res* [Internet]. 2010;  
703 89(1):7–16. Available from:  
704 <https://linkinghub.elsevier.com/retrieve/pii/S0920121109003180>
- 705 46. Dezsi G, Ozturk E, Stanic D, Powell KL, Blumenfeld H, O'Brien TJ, et al.  
706 Ethosuximide reduces epileptogenesis and behavioral comorbidity in the GAERS  
707 model of genetic generalized epilepsy. *Epilepsia*. 2013; 54(4):635–43.
- 708 47. Notomi T, Shigemoto R. Immunohistochemical localization of Ih channel subunits,

- 709 HCN1-4, in the rat brain. *J Comp Neurol.* 2004; 471(3):241–76.
- 710 48. Kanyshkova T, Ehling P, Cerina M, Meuth P, Zobeiri M, Meuth SG, et al. Regionally  
711 specific expression of high-voltage-activated calcium channels in thalamic nuclei of  
712 epileptic and non-epileptic rats. *Mol Cell Neurosci.* 2014; 61:110–22.
- 713 49. Paz JT, Davidson TJ, Frechette ES, Delord B, Parada I, Peng K, et al. Closed-loop  
714 optogenetic control of thalamus as a tool for interrupting seizures after cortical injury.  
715 *Nat Neurosci.* 2013; 16(1):64–70.
- 716 50. Oyrer J, Bleakley LE, Richards KL, Maljevic S, Phillips AM, Petrou S, et al. Using a  
717 Multiplex Nucleic Acid in situ Hybridization Technique to Determine HCN4 mRNA  
718 Expression in the Adult Rodent Brain. *Front Mol Neurosci.* 2019; 12.
- 719 51. Genotype-tissue expression project (GTEx) [Internet]. Available from:  
720 <https://gtexportal.org/home/>
- 721

**A**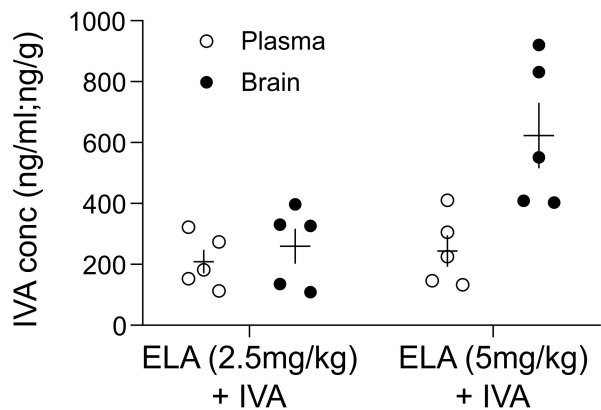**B**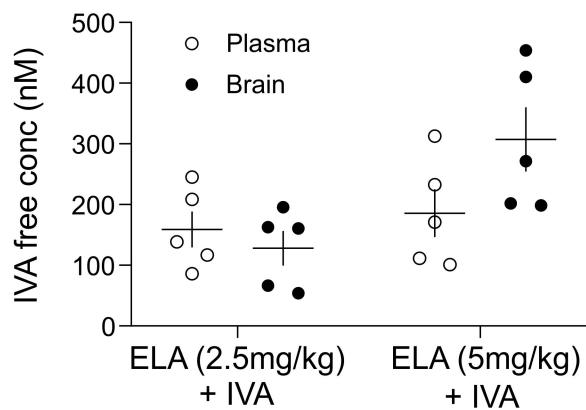**C**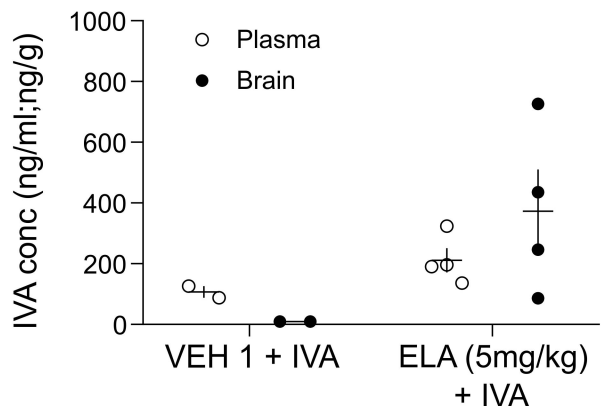**D**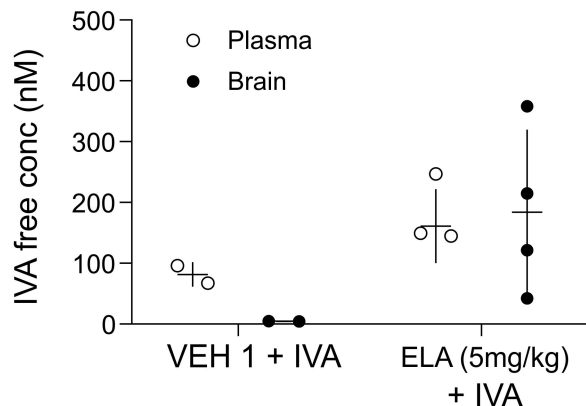

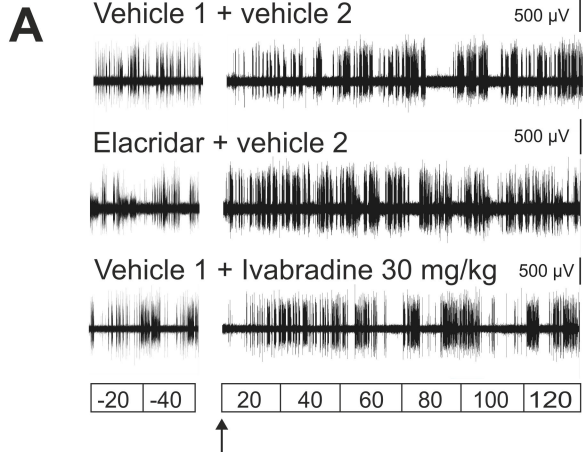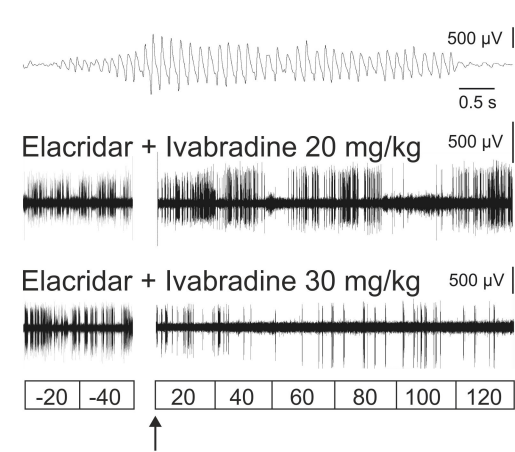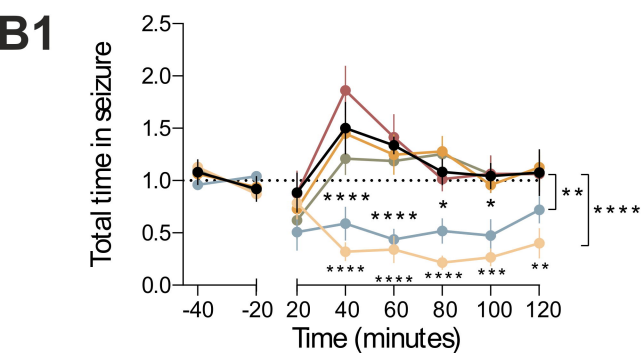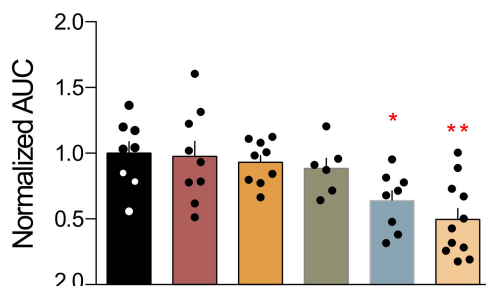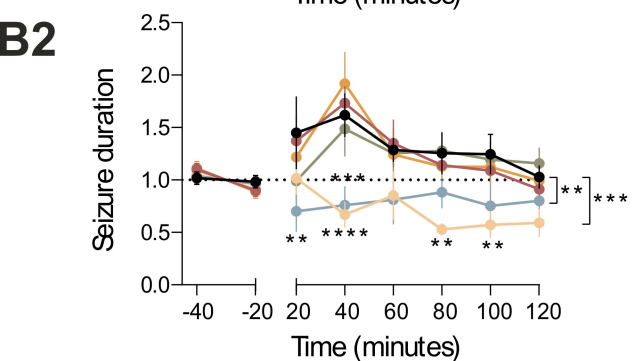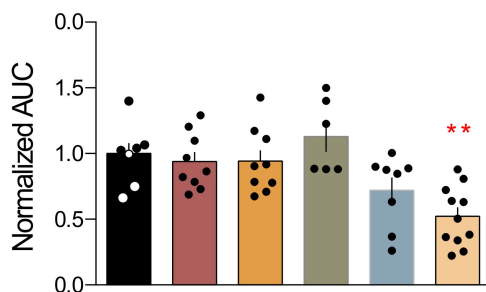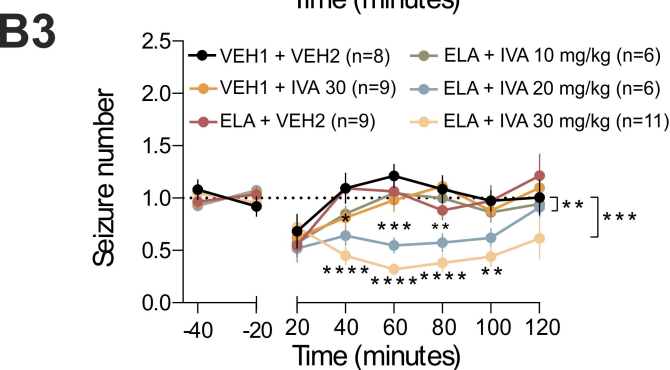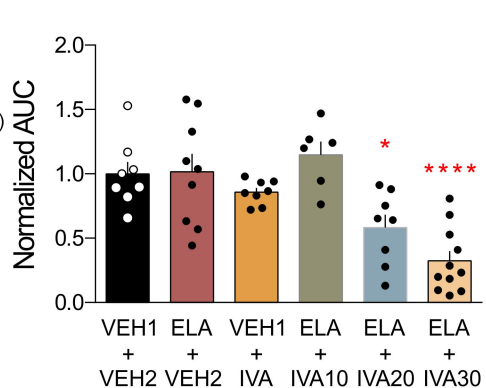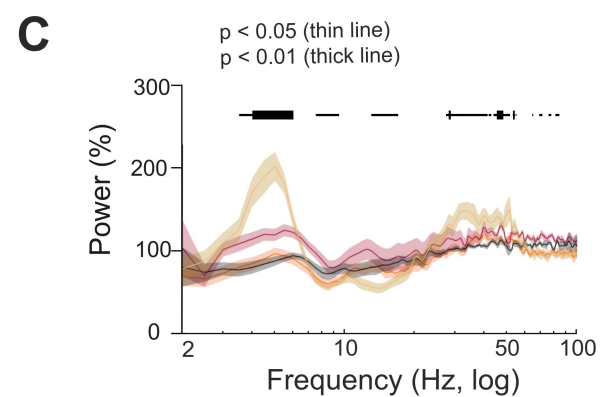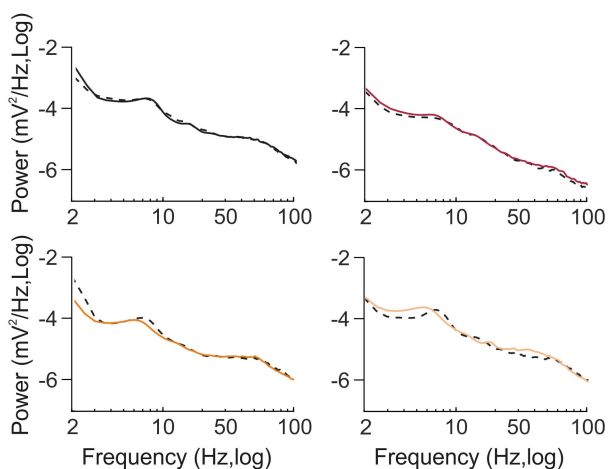

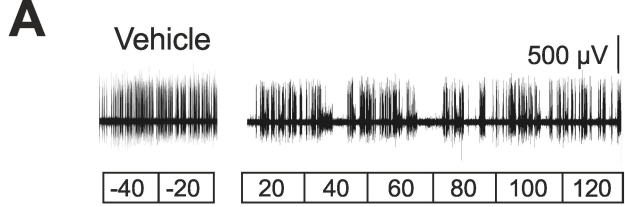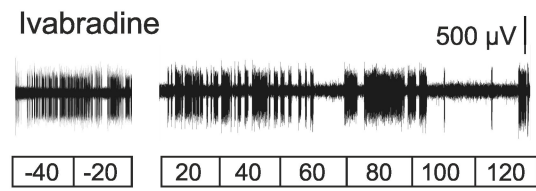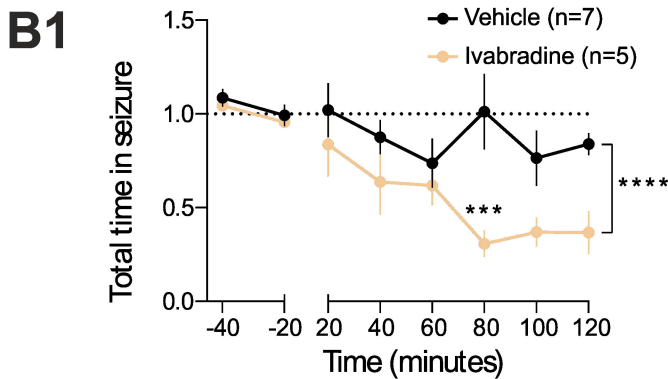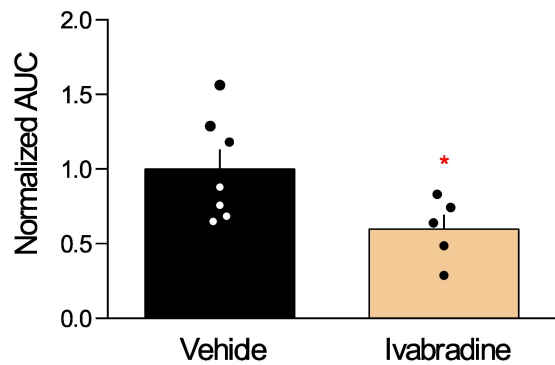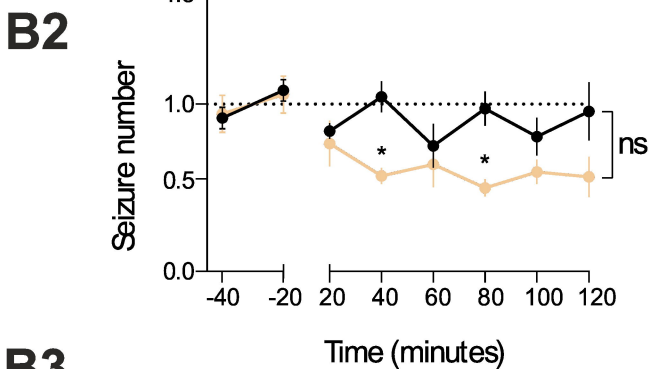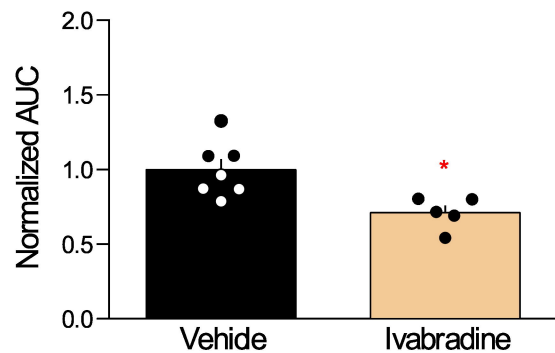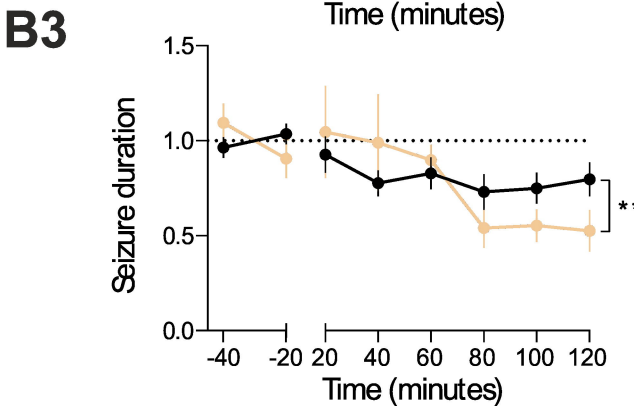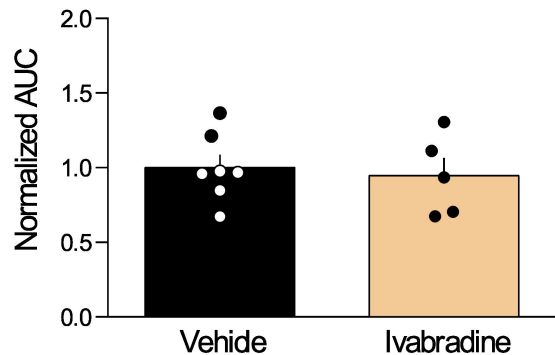

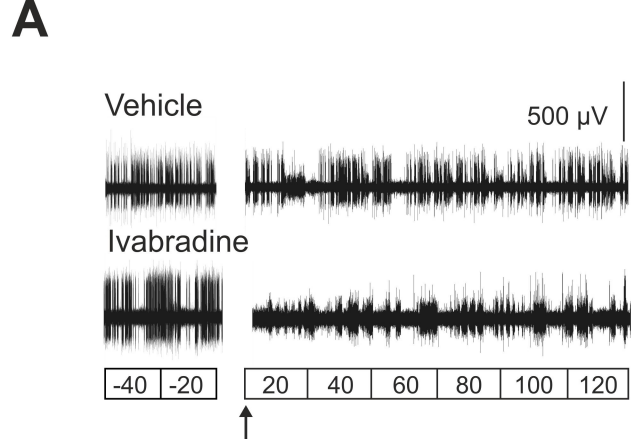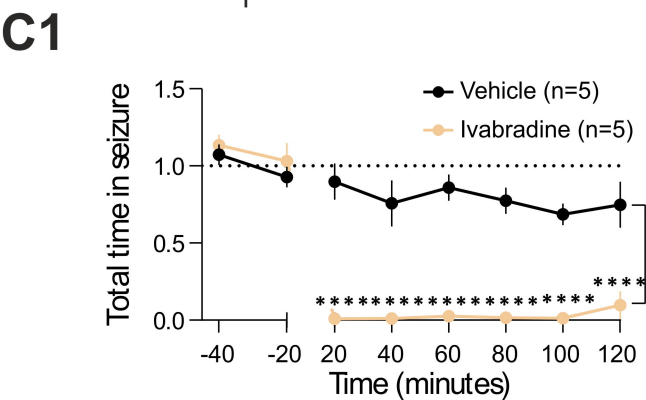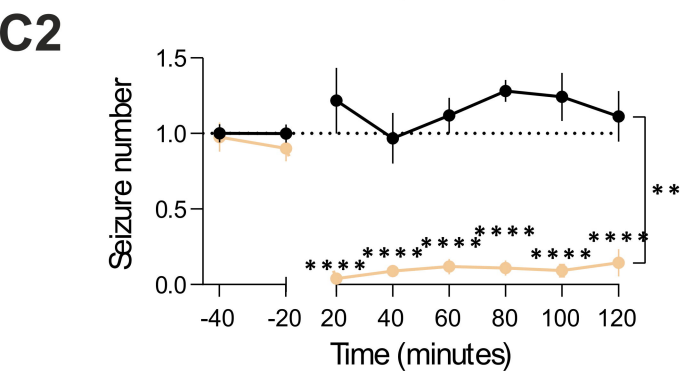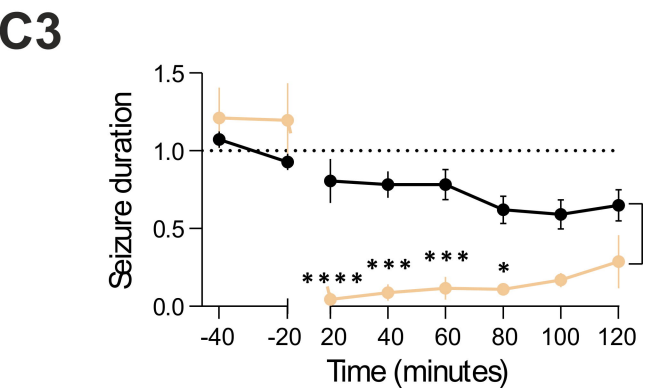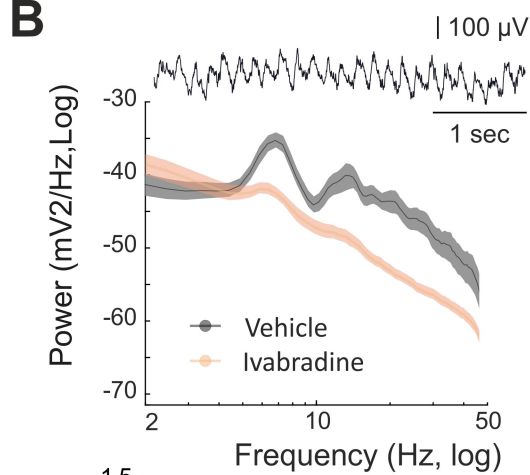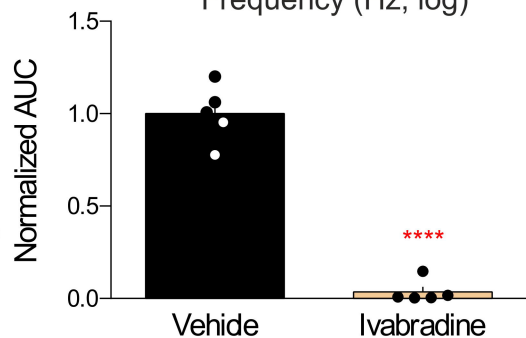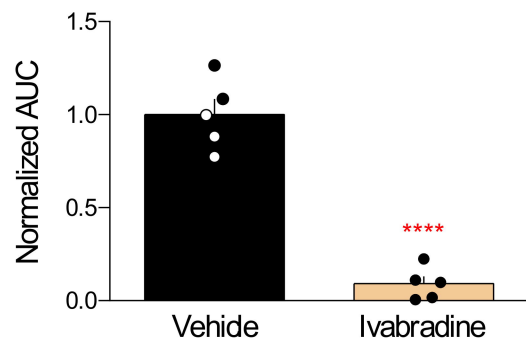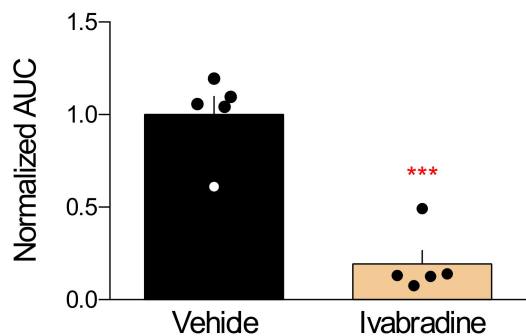

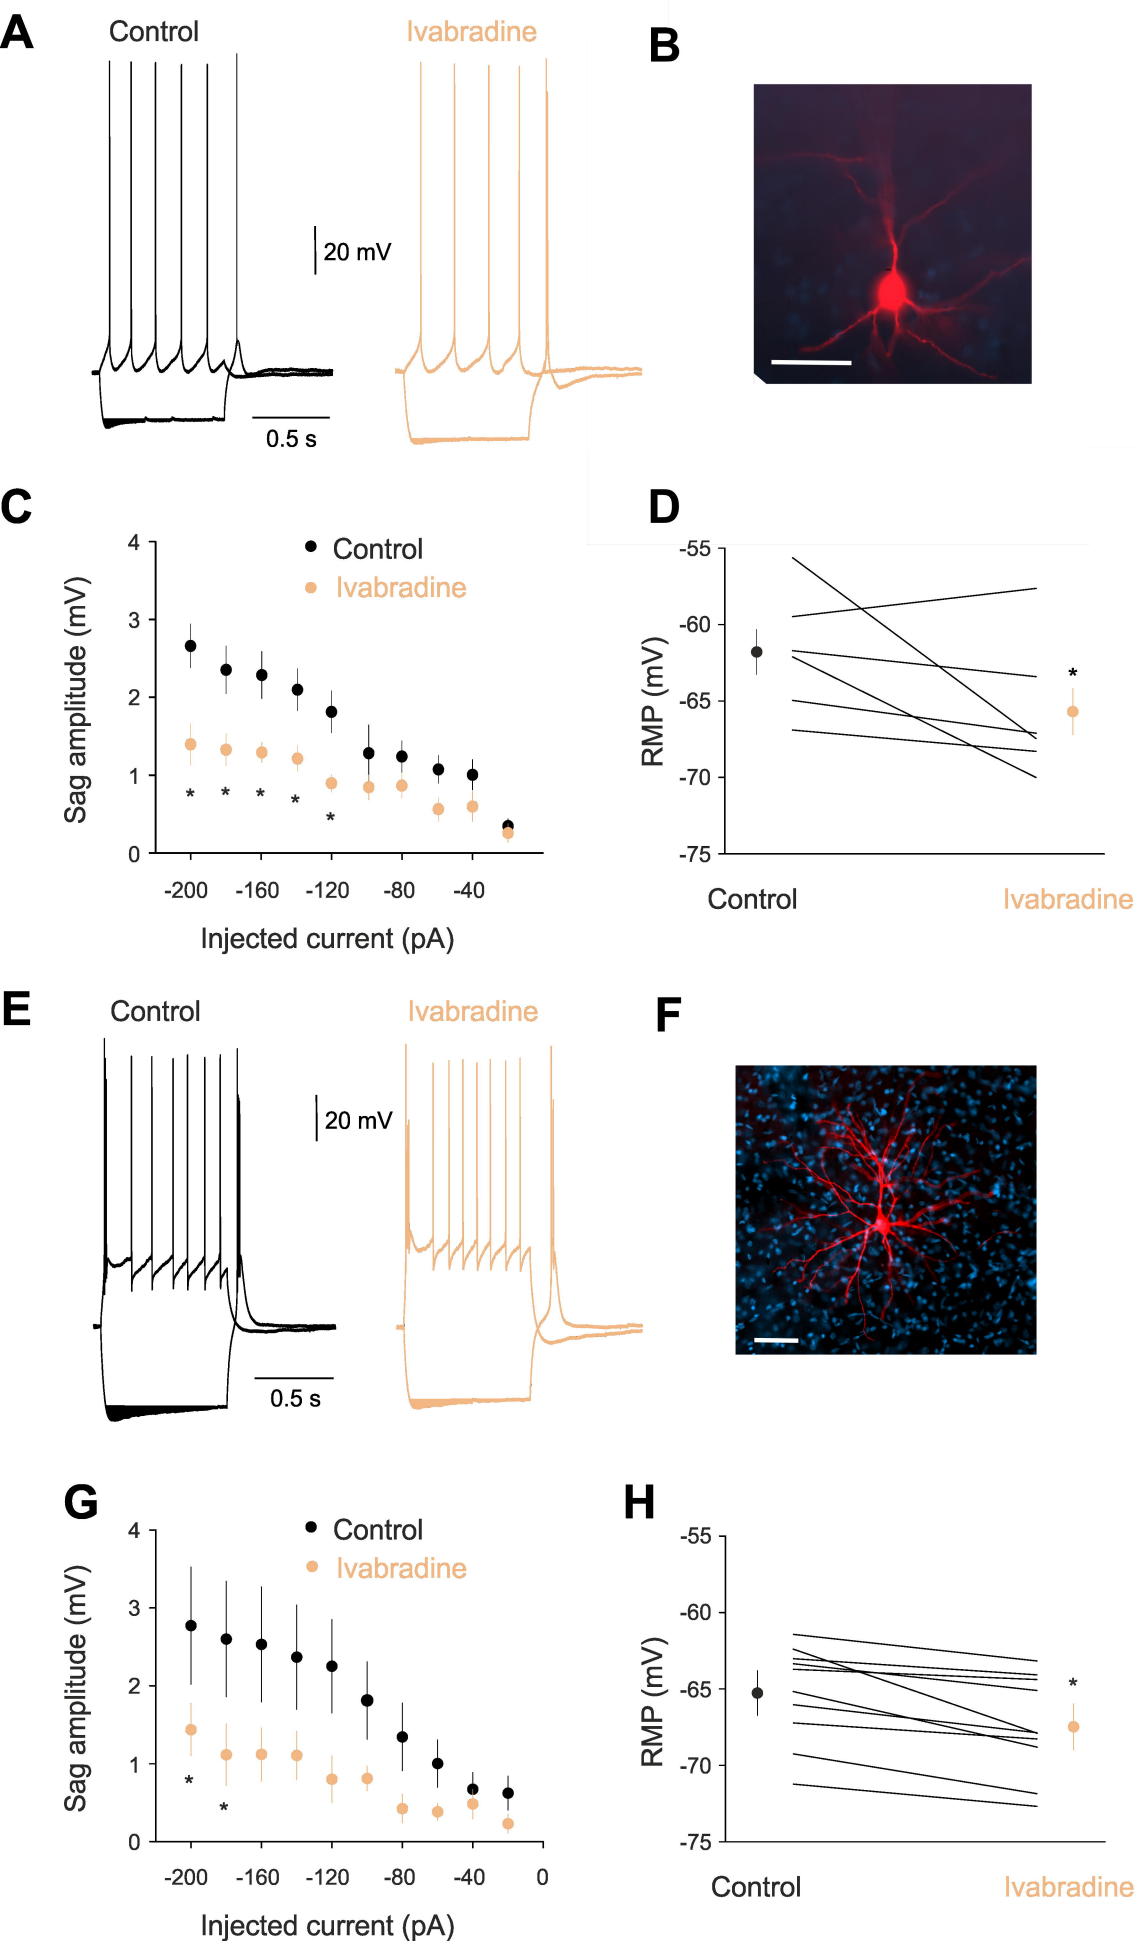

Source: https://www.biorxiv.org/content/biorxiv/early/2021/02/17/2021.02.17.431588.full.pdf
